# Supplementary material for: Evidence of a Large Diversity of N-acyl-Homoserine Lactones in Symbiotic Vibrio fischeri Strains Associated with the Squid Euprymna scolopes
Source: PubMed Central journal article supplement (PMC6440727; doi:10.1264/jsme2.me18145), 2019-02-13

## SUPPLEMENTARY INFORMATION

**Table S1. UHPLC-HRMS data of AHL Standards.** Rt: Retention time. Theoretical and Observed mass correspond to the pseudo-molecular ion  $[M + H]^+$ .

| Standard             | Molecular formula | Theoretical mass | Observed mass | Rt (min) | Limit of detection (nM) |
|----------------------|-------------------|------------------|---------------|----------|-------------------------|
| <b>C4-HSL</b>        | C8H13NO3          | 172.0968         | 172.0968      | 5.27     | >500                    |
| <b>C6-HSL</b>        | C10H17NO3         | 200.1281         | 200.1281      | 8.43     | 3.64                    |
| <b>OXO-C6-HSL</b>    | C10H15NO3         | 214.1074         | 214.1072      | 7.56     | 10.90                   |
| <b>C7-HSL</b>        | C11H19NO3         | 214.1438         | 214.1440      | 8.83     | 5.33                    |
| <b>C8-HSL</b>        | C12H21NO3         | 228.1594         | 228.1594      | 9.27     | 6.50                    |
| <b>OXO-C8-HSL</b>    | C12H19NO4         | 242.1387         | 242.1381      | 8.69     | 6.15                    |
| <b>OH-C8-HSL</b>     | C12H21NO4         | 244.1543         | 244.1540      | 8.55     | -                       |
| <b>C9-HSL</b>        | C13H23NO3         | 242.1751         | 242.1748      | 9.57     | 7.37                    |
| <b>C10-HSL</b>       | C14H25NO3         | 256.1907         | 256.1907      | 9.90     | 4.56                    |
| <b>OXO-C10-HSL</b>   | C14H23NO4         | 270.1700         | 270.1699      | 9.43     | 2.91                    |
| <b>OH-C10-HSL</b>    | C14H25NO4         | 272.1856         | 272.1856      | 9.25     | 3.23                    |
| <b>C11-HSL</b>       | C15H27NO3         | 270.2064         | 270.2063      | 10.13    | 9.11                    |
| <b>C12-HSL</b>       | C16H29NO3         | 284.2220         | 284.2220      | 10.46    | 5.07                    |
| <b>OXO-C12-HSL</b>   | C16H27NO4         | 298.2013         | 298.2013      | 10.04    | 21.28                   |
| <b>OH-C12-HSL</b>    | C16H29NO4         | 300.2169         | 300.2169      | 9.87     | 2.39                    |
| <b>C13-HSL</b>       | C17H31NO3         | 298.2377         | 298.2377      | 10.63    | 14.78                   |
| <b>C14-HSL</b>       | C18H33NO3         | 312.2533         | 312.2533      | 10.93    | 11.82                   |
| <b>C14:1-HSL</b>     | C18H31NO3         | 310.2377         | 310.2370      | 10.51    | 9.41                    |
| <b>OXO-C14:1-HSL</b> | C18H29NO4         | 324.2169         | 324.2170      | 10.23    | 4.71                    |
| <b>OXO-C14-HSL</b>   | C18H31NO4         | 326.2326         | 326.2322      | 10.56    | 6.79                    |
| <b>OH-C14-HSL</b>    | C18H33NO4         | 328.2482         | 328.2482      | 10.42    | 36.58                   |
| <b>C15-HSL</b>       | C19H35NO3         | 326.2690         | 326.2689      | 11.15    | 15.11                   |
| <b>C16-HSL</b>       | C20H37NO3         | 340.2846         | 340.2846      | 11.34    | 16.30                   |
| <b>C16:1-HSL</b>     | C20H35NO3         | 338.2690         | 338.2704      | 10.93    | 14.68                   |
| <b>OXO-C16:1-HSL</b> | C20H33NO4         | 352.2482         | 352.2497      | 10.61    | 6.75                    |
| <b>C18-HSL</b>       | C22H42NO3         | 368.3159         | 368.3155      | 11.66    | 10.48                   |
| <b>C18:1-HSL</b>     | C22H39NO3         | 366.3003         | 366.3003      | 11.40    | 28.56                   |

**Table S2. UHPLC-HRMS data and identification of 3-OH-C9-HSL in *A. fischeri* strains.**

Rt: Retention time. Theoretical and observed mass correspond to the pseudo-molecular ion  $[M + H]^+$ . Bold characters in the fragmentation column are highlighting the daughter ions characteristic of the lactone ring.

| Strain | Rt (min) | Observed mass | Molecular Formula | Delta ppm | Fragmentation                                                                                                                                                                                                                                                                                                                | Identification |                   |                  |                  |
|--------|----------|---------------|-------------------|-----------|------------------------------------------------------------------------------------------------------------------------------------------------------------------------------------------------------------------------------------------------------------------------------------------------------------------------------|----------------|-------------------|------------------|------------------|
|        |          |               |                   |           |                                                                                                                                                                                                                                                                                                                              | Name           | Molecular Formula | Molecular Weight | Theoretical Mass |
| ES213  | 8,9      | 258,1701      | C13H24NO4         | 0,115     | 70.041 (16.93), <b>74.061 (9.53)</b> , 75.027 (16.64), 91.055 (14.94), 93.037 (31.41), <b>102.055 (12.41)</b> , 105.070 (10.50), 109.076 (66.51), 122.084 (18.27), 135.092 (53.91), 137.060 (14.71), 151.075 (81.97), 229.097 (23.28), 244.120 (21.08), 257.128 (13.45), 257.175 (16.47), 258.110 (21.03), 259.144 (100.00)  | OH-C9-HSL      | C13H23NO4         | 257,1627         | 258,1700         |
| MB13B1 |          | 258,1702      |                   | 0,718     | 70.041 (10.26), <b>74.061 (9.68)</b> , 75.027 (12.38), 91.055 (7.87), 93.037 (16.40), <b>102.055 (35.76)</b> , 105.070 (6.38), 109.076 (31.04), 122.084 (10.24), 135.092 (52.27), 137.060 (8.18), 151.075 (33.32), 229.097 (23.46), 244.120 (23.04), 257.128 (6.53), 257.175 (6.67), 258.110 (9.27), 259.144 (100.00)        |                |                   |                  |                  |
| KB2B1  |          | 258,1698      |                   | -0,185    | 70.041 (16.69), <b>74.061 (10.36)</b> , 75.027 (12.97), 91.055 (9.90), 93.037 (15.18), <b>102.055 (18.65)</b> , 105.070 (9.32), 109.076 (54.58), 122.084 (12.89), 135.092 (53.85), 137.060 (10.73), 151.075 (69.36), 229.097 (24.46), 244.120 (18.15), 257.128 (21.52), 257.176 (18.03), 258.110 (17.91), 259.144 (100.00)   |                |                   |                  |                  |
| KB4B5  |          | 258,1696      |                   | -0,395    | 70.041 (14.37), <b>74.061 (13.51)</b> , 75.027 (18.06), 91.055 (12.21), 93.037 (29.99), <b>102.055 (20.07)</b> , 105.070 (12.15), 109.076 (56.22), 122.084 (12.35), 135.092 (45.94), 137.060 (10.86), 151.075 (72.83), 229.097 (22.02), 244.120 (18.48), 257.128 (23.68), 257.177 (14.71), 258.109 (18.25), 259.144 (100.00) |                |                   |                  |                  |
| ES114  |          | 258,1700      |                   | 0,214     | 70.041 (9.43), <b>74.061 (10.47)</b> , 75.027 (36.97), 91.055 (8.93), 93.037 (100.00), <b>102.055 (14.35)</b> , 105.070 (9.00), 109.076 (45.02), 122.084 (9.23), 135.092 (76.51), 137.060 (9.31), 151.075 (51.00), 229.097 (29.82), 244.120 (11.06), 257.128 (15.74), 257.176 (13.72), 258.110 (22.61), 259.144 (100.00)     |                |                   |                  |                  |

**Table S3. UHPLC-HRMS data and identification of oxo-C16:2-HSL in *A. fischeri* strains.** Rt: Retention time. Theoretical and observed mass correspond to the pseudo-molecular ion  $[M + H]^+$ . Bold characters in the fragmentation column are highlighting the daughter ions characteristic of the lactone ring.

| Strain     | Rt (min) | Observed mass | Molecular Formula | Delta ppm | Fragmentation                                                                                                                                                                                                                                                                                            | Identification |                   |                  |                  |
|------------|----------|---------------|-------------------|-----------|----------------------------------------------------------------------------------------------------------------------------------------------------------------------------------------------------------------------------------------------------------------------------------------------------------|----------------|-------------------|------------------|------------------|
|            |          |               |                   |           |                                                                                                                                                                                                                                                                                                          | Name           | Molecular Formula | Molecular Weight | Theoretical Mass |
| ES114      | 9,97     | 350,2326      | C20H32NO4         | -0,043    | <b>56.050 (2.68)</b> , 57.071 (19.57), 69.071 (3.46), 71.086 (24.65), 73.066 (3.34), <b>74.061 (13.01)</b> , 89.060 (75.83), 95.086 (0.69), <b>102.055 (17.33)</b> , 105.070 (100.00), 106.074 (7.71), 109.102 (2.31), 123.085 (1.89), 127.112 (9.03), 133.086 (17.83), 146.081 (6.71), 224.128 (17.40)  | OXO-C16:2-HSL  | C20H31NO4         | 349,2253         | 350,2326         |
| KB4B5      |          | 350,2324      |                   | -0,557    | <b>56.050 (1.26)</b> , 57.071 (22.15), 69.071 (4.62), 71.086 (32.15), 73.066 (2.63), <b>74.061 (10.98)</b> , 89.060 (55.17), 95.086 (2.30), <b>102.055 (17.11)</b> , 105.070 (100.00), 106.074 (7.70), 109.102 (3.48), 123.081 (2.07), 127.112 (10.10), 133.086 (12.62), 146.081 (3.12), 224.128 (12.15) |                |                   |                  |                  |
| MB13B<br>1 |          | 350,2325      |                   | -0,302    | <b>56.050 (3.02)</b> , 57.071 (21.38), 69.071 (4.10), 71.086 (17.95), 73.066 (6.71), <b>74.061 (21.54)</b> , 89.060 (38.94), 95.086 (1.56), <b>102.055 (19.36)</b> , 105.070 (100.00), 106.074 (6.27), 109.102 (4.63), 123.081 (1.93), 127.112 (12.08), 133.086 (19.49), 146.081 (4.58), 224.128 (15.72) |                |                   |                  |                  |

Fig. S1. Retention times curves for C<sub>x</sub>-HSL, oxo-C<sub>x</sub>-HSL and OH-C<sub>x</sub>-HSL based on 23 AHL standards ( $R^2 > 0.99$ ).

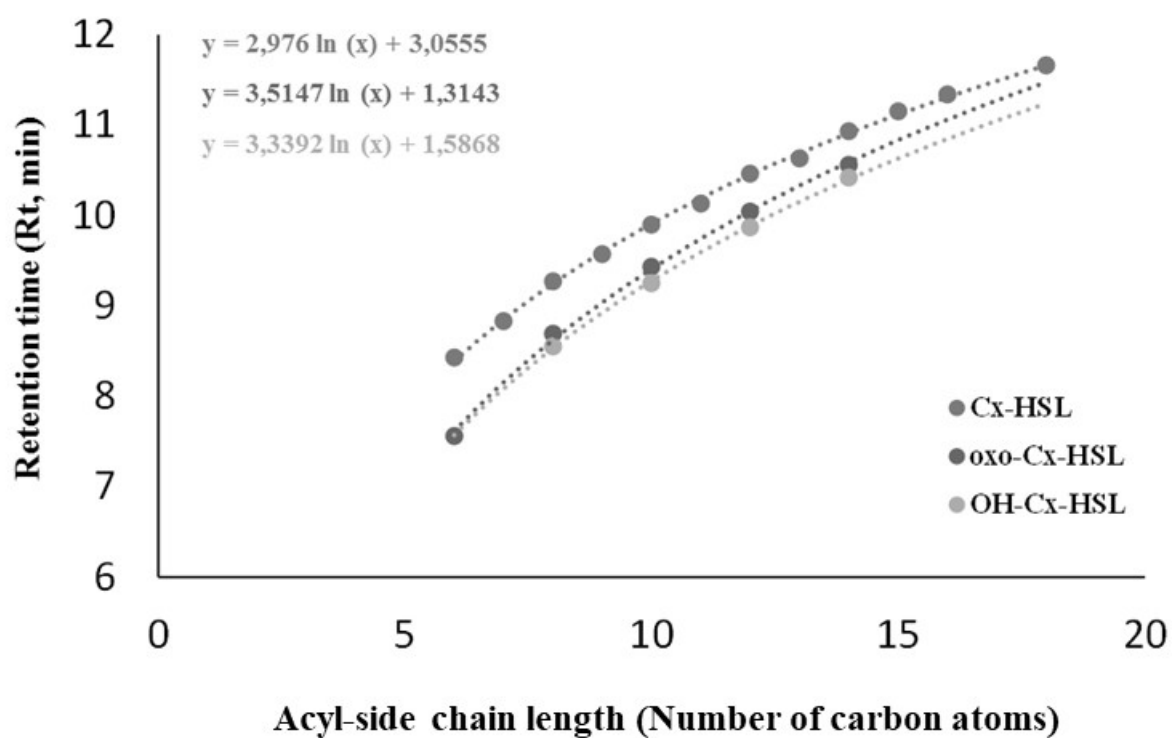

**Fig. S2. Neighbour joining tree of 13 symbiotic *V. fischeri* strains using the JTT model (MEGA). Bootstrap values are based on 1000 replicates. A: AinR (623 aa); B: LuxI (190 aa) and C: LuxR (250 aa).**

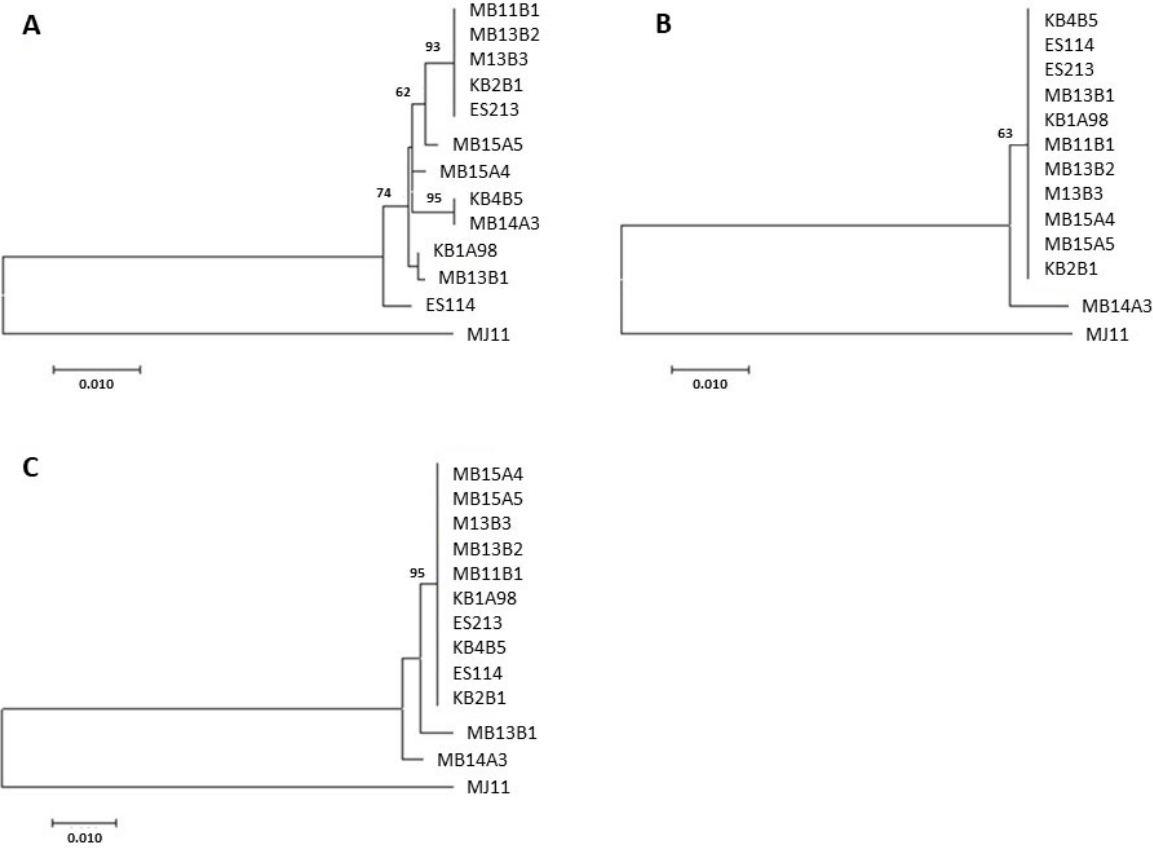

Fig. S3. Alignment of LuxR proteins from the 5 *V. fischeri* strains (250 aa). Asterisks are indicating the amino acid changes in MB13B1 described in Table 2.

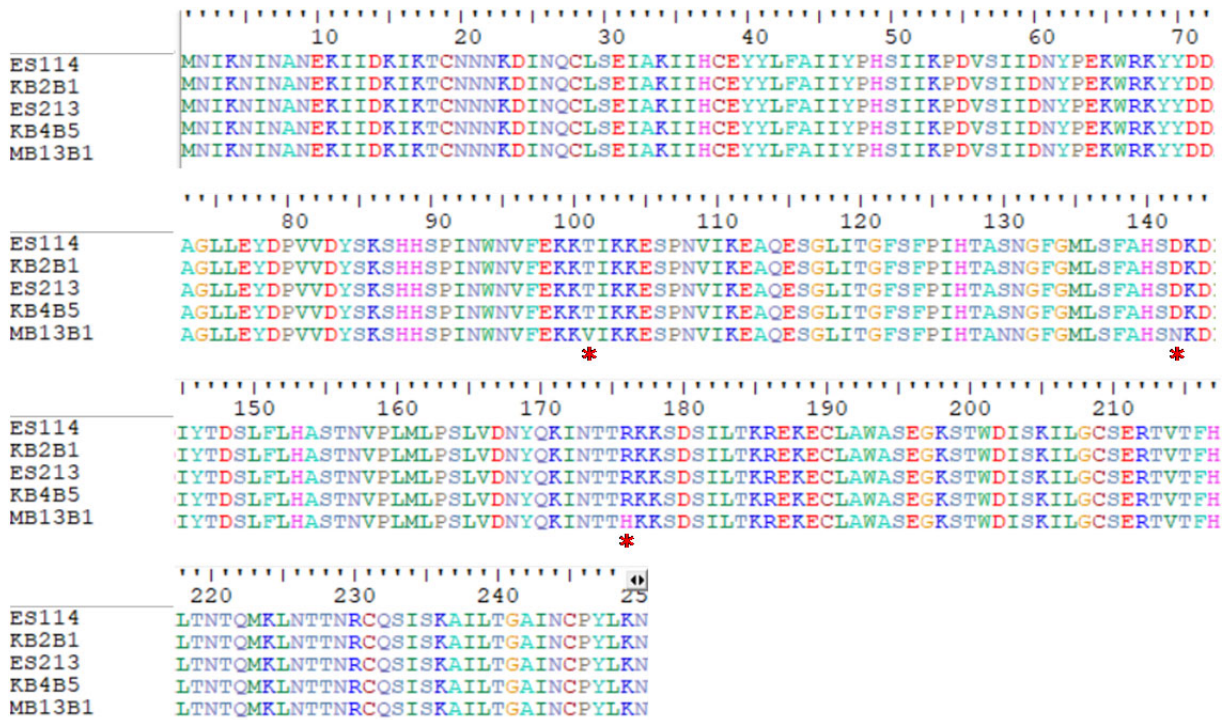

**Fig. S4. Alignment of AinS proteins from the 5 *V. fischeri* strains (355 aa). Asterisks are indicating the amino acid changes in MB13B1 described in Table 2. Accession numbers: ES114: WP\_011261670.1; ES213/KB2B1: WP\_081248857.1; KB4B5: WP\_081249183.1; MB13B1: WP\_081249608.1.**

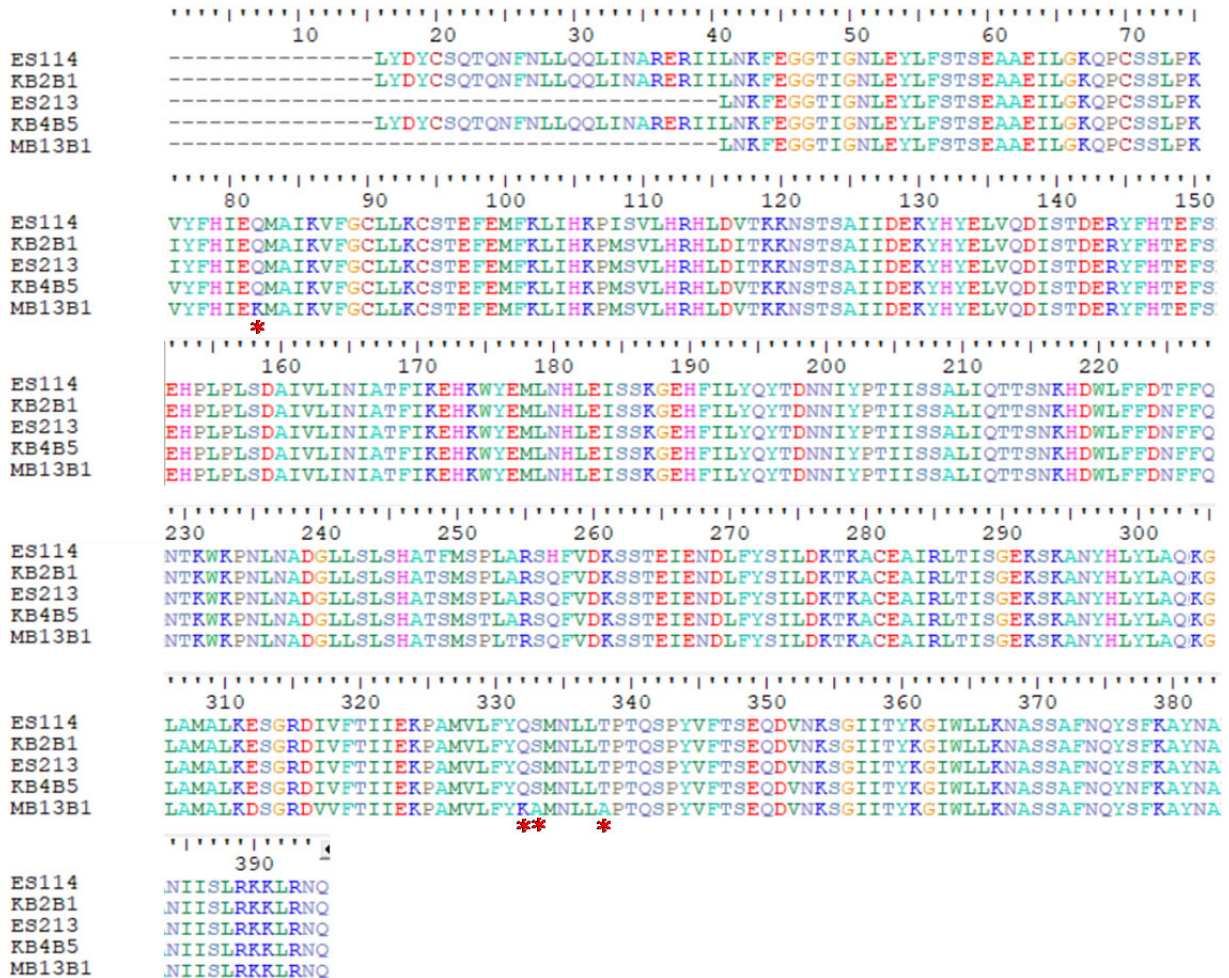

Supplement: 34_99_s1.pdf [file 34_99_s1.pdf]
